# Supplementary material for: The small FNR regulon of Neisseria gonorrhoeae: comparison with the larger Escherichia coli FNR regulon and interaction with the NarQ-NarP regulon
Source: PubMed Central journal article supplement (PMC1802743; doi:10.1186/1471-2164-8-35), 2007-01-29

**A**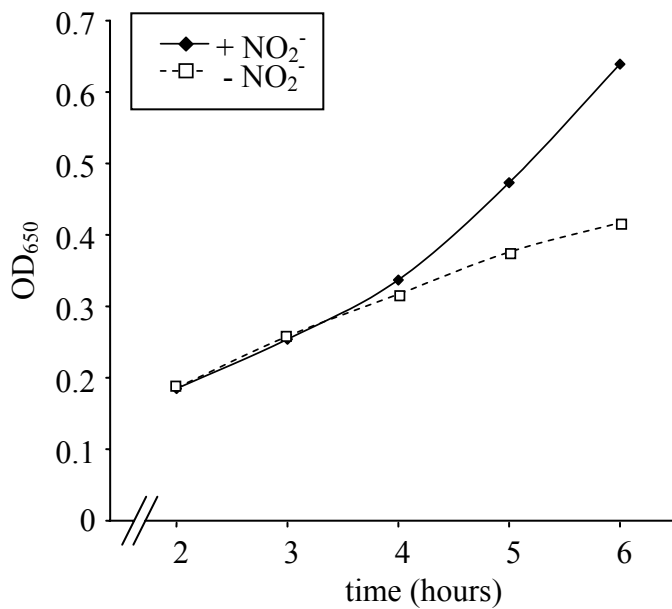**B**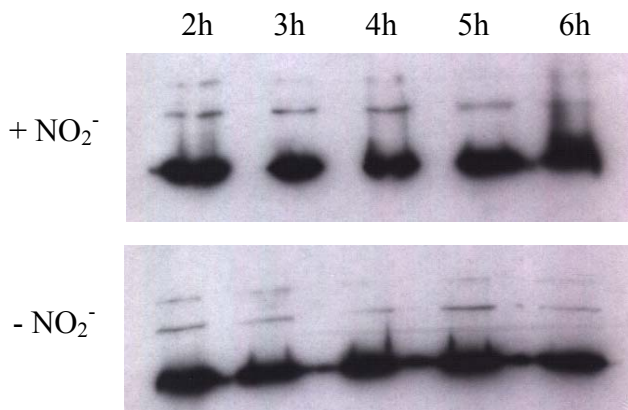

Supplement: 1471-2164-8-35-S2.pdf [file 1471-2164-8-35-S2.pdf]
